# Supplementary material
Source: Springer Nature journal article supplement (https://www.springermedizin.de/resource/supplementary/12913_2013_3757_MOESM2_ESM.pdf/9532460)
Supplement: MOESM2 [file 9532460]

### The COPM interview:

The patient reports those activities difficult to perform within these 3 areas:

- Self-care
- Productivity
- Leisure

Importance of each activity problem is rated from 1 to 10 on a VAS scale by the patient.

The maximum 5 most important activity problems are selected by the OT.

The 5 (or less) prioritised activity problems are rated according to the patients' experienced performance and satisfaction with performance of each activity on a VAS scale from 1 to 10 by the patient.

The 5 (or less) prioritised activity problems form the basis for the goals of the occupational therapy intervention carried out.

### The occupational therapy intervention:

- Maintaining roles
- Compensatory strategies
- Cooperation between occupational therapist and other health professionals (without patient being present)
- Training daily activities
- Home modifications
- Prioritising daily activities
- Upper-limb orthoses
- Facial Oral Tract Therapy (FOTT)
- Instruction and self-training
- Rehabilitation plan for intervention in primary health care

Goal(s) achieved. No further intervention.

Deterioration of the patient's disease. No further intervention.

Follow-up intervention in primary health care.
